# Supplementary material for: Efficient selection of new Limnospira platensis strains (spirulina) for biomass and high-value molecule production
Source: Research Square preprint supplement (doi:10.21203/rs.3.rs-8229846/v1), 2025-12-09
Supplement: Supplementary file 2 [file eeccd4b3082be92fcd1041ca.xlsx]

## Sheet: Supp Table S1. Limnospira 
Supplementary Table S1. List of French Limnospira platensis strains maintained in the Paris Museum Collection (PMC), locaization, habitats, and sampling dates. Genome accession number was precized when available. The steps (A-D) selection are indicated following the Limnospira selection' workflow (Figure 1).
Limnospira platensis	Sampling date	Sampling site	Localization	Habitat	Phylogenetic Clade	Gene Content Cluster	Genome accession numbers	Step A selection (n=17)	Step B selection (n=7)	Step C selection (n=4)	Step D selection (n=1)
PMC 737.11	September 2010	Water column, Lake Dziani Dzaha (12°46′15”S; 45°17′17”E)	Mayotte, France	Alkaline-saline	I	I.2	SAMN33900465
PMC 738.11	September 2010	Water column, Lake Dziani Dzaha (12°46′15”S; 45°17′17”E)	Mayotte, France	Alkaline-saline	I	Unsequenced
PMC 851.14	April 2014	Stromatolite, Lake Dziani Dzaha (12°46′15”S; 45°17′17”E)	Mayotte, France	Alkaline-saline	I	I.2	SAMN40550558	X
PMC 852.14	April 2014	Stromatolite, Lake Dziani Dzaha (12°46′15”S; 45°17′17”E)	Mayotte, France	Alkaline-saline	I	Unsequenced
PMC 853.14	April 2014	Stromatolite, Lake Dziani Dzaha (12°46′15”S; 45°17′17”E)	Mayotte, France	Alkaline-saline	I	Unsequenced		X
PMC 894.15	April 2014	Water column (0m), Lake Dziani Dzaha (12°46′15”S; 45°17′17”E)	Mayotte, France	Alkaline-saline	I	I.2	SAMN33900466
PMC 910.15	April 2014	Water column (0,25m), Lake Dziani Dzaha (12°46′15”S; 45°17′17”E)	Mayotte, France	Alkaline-saline	I	Unsequenced
PMC 912.15	April 2014	Water column (0,25m), Lake Dziani Dzaha (12°46′15”S; 45°17′17”E)	Mayotte, France	Alkaline-saline	I	Unsequenced
PMC 913.15	April 2014	Water column (0,25m), Lake Dziani Dzaha (12°46′15”S; 45°17′17”E)	Mayotte, France	Alkaline-saline	I	Unsequenced
PMC 914.15	April 2014	Water column (0,25m), Lake Dziani Dzaha (12°46′15”S; 45°17′17”E)	Mayotte, France	Alkaline-saline	I	Unsequenced
PMC 916.15	April 2014	Water column (0,25m), Lake Dziani Dzaha (12°46′15”S; 45°17′17”E)	Mayotte, France	Alkaline-saline	I	Unsequenced
PMC 917.15	April 2014	Water column (0,25m), Lake Dziani Dzaha (12°46′15”S; 45°17′17”E)	Mayotte, France	Alkaline-saline	I	I.2	SAMN33900467
PMC 918.15	April 2014	Water column (0,25m), Lake Dziani Dzaha (12°46′15”S; 45°17′17”E)	Mayotte, France	Alkaline-saline	I	Unsequenced
PMC 1223.20	July 2019	Water column (43°27'39.79"N; 4°27'35.76"E), Site n°1	Saintes Maries de la Mer, France	Brackish	I	I.1	SAMN33900469
PMC 1224.20	July 2019	Water column (43°27'39.79"N; 4°27'35.76"E), Site n°1	Saintes Maries de la Mer, France	Brackish	I	Unsequenced
PMC 1225.20	July 2019	Water column (43°27'39.79"N; 4°27'35.76"E), Site n°1	Saintes Maries de la Mer, France	Brackish	I	Unsequenced
PMC 1226.20	July 2019	Water column (43°27'38.96"N; 4°27'36.42"E), Site n°3	Saintes Maries de la Mer, France	Brackish	I	Unsequenced
PMC 1227.20	July 2019	Water column (43°27'38.96"N; 4°27'36.42"E), Site n°3	Saintes Maries de la Mer, France	Brackish	I	Unsequenced		X	X
PMC 1228.20	July 2019	Water column (43°27'39.79"N; 4°27'35.76"E), Site n°1	Saintes Maries de la Mer, France	Brackish	I	Unsequenced
PMC 1229.20	July 2019	Water column (43°27'39.79"N; 4°27'35.76"E), Site n°1	Saintes Maries de la Mer, France	Brackish	I	Unsequenced
PMC 1230.20	July 2019	Water column (43°27'38.96"N; 4°27'36.42"E), Site n°3	Saintes Maries de la Mer, France	Brackish	I	Unsequenced		X
PMC 1231.20	July 2019	Water column (43°27'39.79"N; 4°27'35.76"E), Site n°1	Saintes Maries de la Mer, France	Brackish	I	Unsequenced
PMC 1232.20	July 2019	Water column (43°27'39.79"N; 4°27'35.76"E), Site n°1	Saintes Maries de la Mer, France	Brackish	I	Unsequenced
PMC 1233.20	July 2019	Water column (43°27'39.79"N; 4°27'35.76"E), Site n°1	Saintes Maries de la Mer, France	Brackish	I	Unsequenced		X
PMC 1234.20	July 2019	Water column (43°27'39.79"N; 4°27'35.76"E), Site n°1	Saintes Maries de la Mer, France	Brackish	I	I.1	SAMN33900470
PMC 1235.20	July 2019	Water column (43°27'39.79"N; 4°27'35.76"E), Site n°1	Saintes Maries de la Mer, France	Brackish	I	Unsequenced		X
PMC 1236.20	July 2019	Water column (43°27'39.79"N; 4°27'35.76"E), Site n°1	Saintes Maries de la Mer, France	Brackish	I	I.1	SAMN33900471
PMC 1237.20	July 2019	Water column (43°27'39.79"N; 4°27'35.76"E), Site n°1	Saintes Maries de la Mer, France	Brackish	I	Unsequenced
PMC 1238.20	July 2019	Water column (43°27'39.31"N; 4°27'35.37"E), Site n°2	Saintes Maries de la Mer, France	Brackish	I	I.1	SAMN33900472	X
PMC 1239.20	July 2019	Water column (43°27'39.31"N; 4°27'35.37"E), Site n°2	Saintes Maries de la Mer, France	Brackish	I	Unsequenced
PMC 1240.20	July 2019	Water column (43°27'39.31"N; 4°27'35.37"E), Site n°2	Saintes Maries de la Mer, France	Brackish	I	I.1	SAMN33900473	X
PMC 1241.20	July 2019	Water column (43°27'39.31"N; 4°27'35.37"E), Site n°2	Saintes Maries de la Mer, France	Brackish	I	Unsequenced
PMC 1242.20	July 2019	Water column (43°27'38.96"N; 4°27'36.42"E), Site n°3	Saintes Maries de la Mer, France	Brackish	I	I.1	SAMN33900474	X	X	X
PMC 1243.20	July 2019	Water column (43°27'38.96"N; 4°27'36.42"E), Site n°3	Saintes Maries de la Mer, France	Brackish	I	I.1	SAMN33900475	X	X	X
PMC 1244.20	July 2019	Water column (43°27'38.96"N; 4°27'36.42"E), Site n°3	Saintes Maries de la Mer, France	Brackish	I	Unsequenced		X	X
PMC 1245.20	July 2019	Water column (43°27'38.96"N; 4°27'36.42"E), Site n°3	Saintes Maries de la Mer, France	Brackish	I	I.1	SAMN33900476	X
PMC 1246.20	July 2019	Water column (43°27'38.96"N; 4°27'36.42"E), Site n°3	Saintes Maries de la Mer, France	Brackish	I	Unsequenced		X	X	X	X
PMC 1247.20	July 2019	Water column (43°27'38.96"N; 4°27'36.42"E), Site n°3	Saintes Maries de la Mer, France	Brackish	I	Unsequenced
PMC 1248.20	July 2019	Water column (43°27'38.96"N; 4°27'36.42"E), Site n°3	Saintes Maries de la Mer, France	Brackish	I	Unsequenced		X	X	X
PMC 1249.20	July 2019	Water column (43°27'38.96"N; 4°27'36.42"E), Site n°3	Saintes Maries de la Mer, France	Brackish	I	I.1	SAMN33900477	X	X
PMC 1250.20	July 2019	Water column (43°27'38.96"N; 4°27'36.42"E), Site n°3	Saintes Maries de la Mer, France	Brackish	I	Unsequenced
PMC 1251.20	July 2019	Water column (43°27'38.96"N; 4°27'36.42"E), Site n°3	Saintes Maries de la Mer, France	Brackish	I	Unsequenced
PMC 1252.20	July 2019	Water column (43°27'38.96"N; 4°27'36.42"E), Site n°3	Saintes Maries de la Mer, France	Brackish	I	I.1	SAMN33900478
PMC 1253.20	July 2019	Water column (43°27'39.79"N; 4°27'35.76"E), Site n°1	Saintes Maries de la Mer, France	Brackish	I	Unsequenced
PMC 1254.20	July 2019	Water column (43°27'39.79"N; 4°27'35.76"E), Site n°1	Saintes Maries de la Mer, France	Brackish	I	I.1	SAMN33900479	X
PMC 1255.20	July 2019	Water column (43°27'39.79"N; 4°27'35.76"E), Site n°1	Saintes Maries de la Mer, France	Brackish	I	Unsequenced
PMC 1256.20	July 2019	Water column (43°27'39.79"N; 4°27'35.76"E), Site n°1	Saintes Maries de la Mer, France	Brackish	I	I.1	SAMN33900480
PMC 1257.20	July 2019	Water column (43°27'39.31"N; 4°27'35.37"E), Site n°2	Saintes Maries de la Mer, France	Brackish	I	Unsequenced
PMC 1258.20	July 2019	Water column (43°27'38.96"N; 4°27'36.42"E), Site n°3	Saintes Maries de la Mer, France	Brackish	I	Unsequenced
PMC 1259.20	July 2019	Water column (43°27'38.96"N; 4°27'36.42"E), Site n°3	Saintes Maries de la Mer, France	Brackish	I	Unsequenced
PMC 1260.20	July 2019	Water column (43°27'38.96"N; 4°27'36.42"E), Site n°3	Saintes Maries de la Mer, France	Brackish	I	Unsequenced
PMC 1261.20	July 2019	Water column (43°27'38.96"N; 4°27'36.42"E), Site n°3	Saintes Maries de la Mer, France	Brackish	I	I.1	SAMN33900481
PMC 1277.21	September 2020	Water column (43°27'39.79"N; 4°27'35.76"E), Site n°1	Saintes Maries de la Mer, France	Brackish	I	Unsequenced
PMC 1278.21	September 2020	Water column (43°27'39.79"N; 4°27'35.76"E), Site n°1	Saintes Maries de la Mer, France	Brackish	I	Unsequenced		X
PMC 1279.21	September 2020	Water column (43°27'39.79"N; 4°27'35.76"E), Site n°1	Saintes Maries de la Mer, France	Brackish	I	I.1	SAMN33900482
PMC 1280.21	September 2020	Water column (43°27'39.79"N; 4°27'35.76"E), Site n°1	Saintes Maries de la Mer, France	Brackish	I	I.1	SAMN33900483
PMC 1281.20	September 2020	Water column (43°27'39.79"N; 4°27'35.76"E), Site n°1	Saintes Maries de la Mer, France	Brackish	I	I.1	SAMN33900484
PMC 1282.20	September 2020	Water column (43°27'39.79"N; 4°27'35.76"E), Site n°1	Saintes Maries de la Mer, France	Brackish	I	Unsequenced
PMC 1283.21	September 2020	Water column (43°27'39.31"N; 4°27'35.37"E), Site n°2	Saintes Maries de la Mer, France	Brackish	I	Unsequenced
PMC 1284.21	September 2020	Water column (43°27'39.31"N; 4°27'35.37"E), Site n°2	Saintes Maries de la Mer, France	Brackish	I	Unsequenced
PMC 1285.21	September 2020	Water column (43°27'39.31"N; 4°27'35.37"E), Site n°2	Saintes Maries de la Mer, France	Brackish	I	Unsequenced
PMC 1286.21	September 2020	Water column (43°27'39.31"N; 4°27'35.37"E), Site n°2	Saintes Maries de la Mer, France	Brackish	I	I.1	SAMN33900485
PMC 1287.21	September 2020	Water column (43°27'39.31"N; 4°27'35.37"E), Site n°2	Saintes Maries de la Mer, France	Brackish	I	Unsequenced
PMC 1288.21	September 2020	Water column (43°27'39.31"N; 4°27'35.37"E), Site n°2	Saintes Maries de la Mer, France	Brackish	I	Unsequenced
PMC1289.21	September 2020	Water column (43°27'39.31"N; 4°27'35.37"E), Site n°2	Saintes Maries de la Mer, France	Brackish	I	Unsequenced
PMC 1290.21	September 2020	Water column (43°27'39.31"N; 4°27'35.37"E), Site n°2	Saintes Maries de la Mer, France	Brackish	I	I.1	SAMN33900486
PMC 1291.21	September 2020	Water column (43°27'39.31"N; 4°27'35.37"E), Site n°2	Saintes Maries de la Mer, France	Brackish	I	I.1	SAMN33900487
PMC 1292.21	September 2020	Water column (43°27'39.31"N; 4°27'35.37"E), Site n°2	Saintes Maries de la Mer, France	Brackish	I	Unsequenced
PMC 1293.21	September 2020	Water column (43°27'39.31"N; 4°27'35.37"E), Site n°2	Saintes Maries de la Mer, France	Brackish	I	I.1	SAMN33900488
PMC 1294.21	September 2020	Water column (43°27'39.31"N; 4°27'35.37"E), Site n°2	Saintes Maries de la Mer, France	Brackish	I	Unsequenced
PMC1295.21	September 2020	Water column (43°27'39.31"N; 4°27'35.37"E), Site n°2	Saintes Maries de la Mer, France	Brackish	I	I.1	SAMN33900489
PMC 1296.21	September 2020	Water column (43°27'39.31"N; 4°27'35.37"E), Site n°2	Saintes Maries de la Mer, France	Brackish	I	Unsequenced
PMC 1297.21	September 2020	Water column (43°27'39.31"N; 4°27'35.37"E), Site n°2	Saintes Maries de la Mer, France	Brackish	I	Unsequenced
PMC 1298.21	September 2020	Water column (43°27'38.96"N; 4°27'36.42"E), Site n°3	Saintes Maries de la Mer, France	Brackish	I	I.1	SAMN33900490
PMC 1299.21	September 2020	Water column (43°27'38.96"N; 4°27'36.42"E), Site n°3	Saintes Maries de la Mer, France	Brackish	I	Unsequenced
PMC 1300.21	September 2020	Water column (43°27'38.96"N; 4°27'36.42"E), Site n°3	Saintes Maries de la Mer, France	Brackish	I	Unsequenced
PMC 1301.21	September 2020	Water column (43°27'38.96"N; 4°27'36.42"E), Site n°3	Saintes Maries de la Mer, France	Brackish	I	Unsequenced
PMC 1302.21	September 2020	Water column (43°27'38.96"N; 4°27'36.42"E), Site n°3	Saintes Maries de la Mer, France	Brackish	I	Unsequenced
PMC 1303.21	September 2020	Water column (43°27'38.96"N; 4°27'36.42"E), Site n°3	Saintes Maries de la Mer, France	Brackish	I	Unsequenced
PMC 1304.21	September 2020	Water column (43°27'38.96"N; 4°27'36.42"E), Site n°3	Saintes Maries de la Mer, France	Brackish	I	Unsequenced
PMC 1305.21	September 2020	Water column (43°27'38.96"N; 4°27'36.42"E), Site n°3	Saintes Maries de la Mer, France	Brackish	I	Unsequenced
PMC 1306.21	September 2020	Water column (43°27'38.96"N; 4°27'36.42"E), Site n°3	Saintes Maries de la Mer, France	Brackish	I	I.1	SAMN33900491
PMC 1307.21	September 2020	Water column (43°27'39.79"N; 4°27'35.76"E), Site n°1	Saintes Maries de la Mer, France	Brackish	I	Unsequenced
PMC 1308.21	September 2020	Water column (43°27'39.31"N; 4°27'35.37"E), Site n°2	Saintes Maries de la Mer, France	Brackish	I	Unsequenced
PMC 1309.21	September 2020	Water column (43°27'39.31"N; 4°27'35.37"E), Site n°2	Saintes Maries de la Mer, France	Brackish	I	Unsequenced

## Sheet: Supp Table S2A
Supplementary Table S2A : List of previous studies focused on the impact of light quality on growth, biomass and photosynthetic pigments. W: White, R: Red, B: Blue, G: Green, Y: Yellow, DR: Deep red. Colour mixtures (for three references) – RB : Red-Blue, RG : Red-Green, RBG : Red-Blue-Green.
Reference	W	R	B	G	Y	Other	Light Intensity (µmol m-2 s-1)	Photoperiod	Culture mode
Olaizola et Duerr, 1990						No	66-1500	NP
Babu et al., 1991						No	126	24:00
Wang et al., 2007						No	0, 300, 750, 1500, 2250, 3000	24:00
Ravelonandro et al., 2008						No	9, 18, 23, 28	24:00
Chen et al., 2010						No	0, 750, 1500, 3000	24:00
Chainapong et al., 2012						No	NP (sun light)	NP (sun light)	Auto/Mixotrophy
Markou, 2014						Pink	207	24:00
Lee et al., 2015						R+B	75, 150, 300	24:00	Colour variation
Bhanudas Bachchhav et al., 2016						No	70	NP	Auto/Mixotrophy
da Fontoura Prates et al., 2018						No	3200	18:6 / 24:0
Lima et al., 2018						DR, RB	100	NP
Mao et Guo, 2018						RB, RG, RBG	150	23:01:00
da Fontoura Prates et al., 2020						No	42, 500	18:6 / 24:0
Van-Hieu et al., 2021						3 R	16, 192, 410, 1186	24:00
Jung et al., 2022						No	12	24:00

## Sheet: Supp Table S2B
Supplementary Table S2B : Effects of light quality showing a positive (+) or negative (-) effect are indicated by the colour of the box. X : all other light intensities condtions. NC : not comparable. W: White, R: Red, B: Blue, G: Green, Y: Yellow, DR: Deep Red. Colour mixtures (for three references) – RB : Red-Blue, RG : Red-Green, RBG : Red-Blue-Green. a : chlorophyll a in % of dry biomass (DW)…
Reference	DW max					DW prod					µmax			PBP.g-1				PBP.L-1				Chl a			Carotenoids		Proteins				Lipids		Sugars
	+			-		+			-		+	-		+				+		-		+	-		+	-	+		-		+	-	+	-
Olaizola et Duerr, 1990																						a	a		b	b
Babu et al., 1991
Wang et al., 2007
Ravelonandro et al., 2008																						a	a
Chen et al., 2010														=								c	c
Chainapong et al., 2012																						= a			= b
Markou, 2014																X						X	a	a	= b		X					X	=
Lee et al., 2015	RB
Bhanudas Bachchhav et al., 2016
da Fontoura Prates et al., 201824:0												X															X				=		=
da Fontoura Prates et al., 201818:6																															=		=
Lima et al., 2018	R7B3					R7B3												R7B3				= a			= b
Mao et Guo, 2018	X					X								RBG		R8B2						= a			= b		R8G2		R8B2		=		R8B2	R8G2
da Fontoura Prates et al., 202024:0																											d		Xd
da Fontoura Prates et al., 202018:6																											d	d	d	d
Van-Hieu et al., 2021	NC										NC							NC
Jung et al., 2022																X

## Sheet: Supp Table S3A-D. conditions
Supp.Table S3A. Culture conditions used for the step A selection of L. platensis (n = 85) in flask with10 mL of specifc "Spirulina" medium (triplicated).
Number of sub-cultures	DO750nm	Light quality	Light intensity (µmol m-2 s-1)	Photoperiod (h:h)	Temperature (°C)	Time of culture (day)
A	above 0.05	white	50	16:08:00	24	above 28
B	above 0.05	white	50	18:06:00	24	above 28
C	above 0.05	white	50	18:06:00	24	above 28
Supp.Table S3B. Culture conditions used for the step B selection of L. platensis (n = 17) in 250 mL ErlenMeyer with 160 mL of specifc "Spirulina" medium.
Number of sub-cultures	DO750nm	Light quality	Light intensity (µmol m-2 s-1)	Photoperiod (h:h)	Temperature (°C)	Time of culture (day)
1	0.05	white	80	17:07:00	25	13
2	0.05	white	120	18:06:00	25	14
3	0.05	white	180	19:05:00	25	10
4	0.05	white	180	20:04:00	25	7
5	0.05	white	200	22:02:00	25	7
6	0.05	white	200	22:02:00	25	6
7	0.05	white	200	22:02:00	25	8
Supp.Table S3C. Culture conditions used for the step C selection of L. platensis (n = 7) in 250 mL ErlenMeyer with 170 mL of specifc "Spirulina" medium.
Number of sub-cultures	DO750nm	Light quality	Light intensity (µmol m-2 s-1)	Photoperiod (h:h)	Temperature (°C)	Time of culture (day)
8	0.05	white	200	22:02:00	28	7
9	0.05	white /red	200	22:02:00	28	7
10	0.07	white /red	200	22:02:00	30	7
11	0.07	white /red	200	22:02:00	30	7
Supp.Table S3D. Culture conditions used for the step D selection of L. platensis (n = 4, in triplicats) in 250 mL ErlenMeyer with 170 mL of specifc "Spirulina" medium.
Number of sub-cultures	DO750nm	Light quality	Light intensity (µmol m-2 s-1)	Photoperiod (h:h)	Temperature (°C)	Time of culture (day)
12	0.07	white/red	200	22:02:00	30	12

## Sheet: Supp Table S4. step A
Table S4. Concentrations of phycobiliproteins, long chain polyunsaturated fatty acids and carotenoids, total intensity of antioxydant metabolites, and apparent growth associated with respective scores (= rank) of each L. platensis strains originated from France. The 17 selected strains are highlighted in blue.
Strain	PBP [mg g-1 DW]		LC-PUFAs [mg g-1 DW]		Car [µg g-1 DW]		UHPLC-MS/MS Tot		Growth	Mean Rank	Median Rank	Selection
	Conc	Rank	Conc	Rank	Conc	Rank	Int	Rank	Rank
PMC 737.11	80.196	10	31.552	2	269.3	71	1583426	41	14	18	14
PMC 738.11	65.447	38	25.307	16	308.79	71	1242628	67	35	38.25	35
PMC 851.14	89.889	10	36.373	2	303	71	1904704	41	1	12.58	2	X
PMC 852.14	98.177	1	36.523	2	291.44	71	2069120	21	14	14.08	14
PMC 853.14	77.27	10	33.531	2	315.46	71	1610441	41	1	12.58	2	X
PMC 894.15	84.909	10	45.043	1	461.96	71	1402169	67	35	28.75	35
PMC 910.15	70.186	38	28.4	16	657.69	71	1454814	67	35	38.25	35
PMC 912.15	37.465	79	15.604	40	212.08	71	750912	79	35	53.5	40
PMC 913.15	52.47	70	10.917	63	387.88	71	1046522	67	35	54.08	63
PMC 914.15	74.973	38	17.8	40	335.58	71	1133100	67	35	42.25	38
PMC 916.15	73.24	38	16.585	40	352.1	71	1037060	67	35	42.25	38
PMC 917.15	81.234	10	27.161	16	342.51	71	1265617	67	35	31.25	35
PMC 918.15	56.4	70	16.205	40	453.53	71	1144499	67	35	50.25	40
PMC 1223.20	64.723	38	21.18	40	1791.16	3	1886163	41	35	34.41	36.5
PMC 1224.20	74.708	38	8.785	63	943.92	14	2352348	21	35	37.5	35
PMC 1225.20	67.696	38	10.54	63	887.87	14	2178152	21	35	37.5	35
PMC 1226.20	82.225	10	27.436	16	938.99	14	2223544	21	35	22.66	18.5
PMC 1227.20	84.67	10	35.919	2	923.89	14	2709508	1	14	9.91	12	X
PMC 1228.20	86.024	10	28.288	16	1018.55	14	2514098	1	35	21	16
PMC 1229.20	80.935	10	26.278	16	1225.99	14	2295088	21	35	22.66	18.5
PMC 1230.20	84.599	10	29.638	2	1197.54	14	2683506	1	14	9.91	12	X
PMC 1231.20	74.022	38	27.553	16	1052.09	14	2469028	21	35	29.66	35
PMC 1232.20	46.451	79	15.916	40	817.67	14	1515756	41	35	45.58	37.5
PMC 1233.20	85.335	10	34.905	2	756.58	14	2487204	1	1	4.5	1.5	X
PMC 1234.20	75.706	38	23.301	16	837.24	14	2312944	21	35	29.66	35
PMC 1235.20	78.33	10	26.026	16	820.28	14	2437596	21	1	8.5	10	X
PMC 1236.20	75.417	38	26.128	16	852.64	14	2542812	1	14	19.25	14
PMC 1237.20	75.35	38	25.743	16	1039.13	14	2505106	1	14	19.25	14
PMC 1238.20	86.415	10	29.758	2	885.65	14	2560026	1	14	9.91	12	X
PMC 1239.20	75.708	38	27.385	16	1213.45	14	2633904	1	35	28	35
PMC 1240.20	81.454	10	31.1	2	1098.67	14	2329386	21	14	11.58	14	X
PMC 1241.20	76.941	38	11.261	63	1205.01	14	1865652	41	1	25	26
PMC 1242.20	93.314	1	35.956	2	923.95	14	2548217	1	35	16.41	8	X
PMC 1243.20	78.974	10	29.961	2	989.9	14	2065086	21	14	11.58	14	X
PMC 1244.20	87.697	10	33.86	2	689.81	71	2799768	1	1	9.25	1.5	X
PMC 1245.20	96.242	1	14.184	40	1031.11	14	2973362	1	1	8.58	1	X
PMC 1246.20	89.429	10	27.19	16	1036.15	14	2400747	21	14	13.91	14	X
PMC 1247.20	65.864	38	21.408	40	966.83	14	1733506	41	14	26.58	26
PMC 1248.20	87.108	10	24.604	16	1058.5	14	2590912	1	14	12.25	14	X
PMC 1249.20	74.313	38	26.398	16	1191.66	14	2509445	1	1	13.83	7.5	X
PMC 1250.20	71.956	38	25.105	16	1246.31	14	1927802	41	14	22.58	15
PMC 1251.20	89.151	10	16.361	40	1541.81	3	2771914	1	35	24.08	35
PMC 1252.20	59.2	70	22.176	16	1032.92	14	1666668	41	14	30.58	15
PMC 1253.20	73.156	38	10.747	63	883.72	14	1941310	41	1	25	26
PMC 1254.20	77.495	10	29.466	16	1236.04	14	2306115	21	14	13.91	14	X
PMC 1255.20	63.127	70	7.41	63	1018.97	14	1695234	41	35	47.16	38
PMC 1256.20	74.345	38	24.703	16	795.73	14	1911777	41	1	17.16	15
PMC 1257.20	44.358	79	6.126	63	557.48	71	1264385	67	14	47.58	63
PMC 1258.20	68.935	38	14.618	40	1007.09	14	2327128	21	14	24.91	17.5
PMC 1259.20	48.635	79	6.261	63	1302.61	3	1674479	41	1	34.33	22
PMC 1260.20	55.527	70	6.867	63	1518.62	3	2516866	1	14	34.16	14
PMC 1261.20	68.869	38	26.034	16	1640.41	3	1849640	41	14	21.66	15
PMC 1277.21	76.876	38	8.586	63	1185.57	14	1837960	41	35	39.16	36.5
PMC 1278.21	54.235	70	12.198	63	2871.82	1	2994466	1	1	28.58	1	X
PMC 1279.21	64.755	38	25.133	16	2746.76	1	2836670	1	35	26.91	35
PMC 1280.21	81.471	10	34.375	2	909.68	14	2220694	21	35	20.33	17.5
PMC 1281.21	74.63	38	26.118	16	1226.68	14	1810641	41	35	31.33	35
PMC 1282.21	93.248	1	17.37	40	1163.58	14	2858912	1	35	22.75	35
PMC 1283.21	64.265	38	11.496	63	815.86	14	1434026	67	35	41.33	36.5
PMC 1284.21	103.67	1	13.323	63	1056.16	14	1747214	41	35	29.91	35
PMC 1285.21	63.507	70	13.051	63	849.61	14	1650976	41	35	47.16	38
PMC 1286.21	68.334	38	24.306	16	1024.62	14	440250	79	35	34.5	35
PMC 1287.21	74.42	38	12.553	63	899.37	14	NA	NA	35	39	35
PMC 1288.21	67.11	38	12.379	63	860.02	14	NA	NA	35	39	35
PMC 1289.21	76.411	38	11.907	63	888.94	14	1575230	41	35	39.16	36.5
PMC 1290.21	48.483	79	19.76	40	1089.74	14	1544505	41	35	45.58	37.5
PMC 1291.21	96.938	1	36.422	2	1055.91	14	2000960	21	35	18.08	17.5
PMC 1292.21	82.979	10	19.92	40	1304.97	3	2487764	1	35	24.08	35
PMC 1293.21	43.047	79	16.743	40	745.61	14	1260736	67	1	33.58	27
PMC 1294.21	93.968	1	16.506	40	1449.87	3	2469244	21	35	23.5	35
PMC 1295.21	60.131	70	26.025	16	940.86	14	1481682	41	35	39.33	35
PMC 1296.21	86.448	10	18.952	40	1394.05	3	2149076	21	35	25.75	35
PMC 1297.21	82.588	10	16.936	40	1236.58	14	2130670	21	35	26.66	35
PMC 1298.21	94.685	1	17.043	40	1218.62	14	NA	NA	35	24.72	35
PMC 1299.21	72.68	38	10.005	63	1354.15	3	1792352	41	35	38.25	36.5
PMC 1300.21	85.385	10	17.72	40	1229.83	14	NA	NA	35	27.18	35
PMC 1301.21	63.881	70	9.541	63	1058.58	14	1614058	41	14	38.41	27.5
PMC 1302.21	75.408	38	12.058	63	1009.03	14	NA	NA	35	39	35
PMC 1303.21	91.49	1	17.682	40	1182.46	14	2325980	21	35	24.41	35
PMC 1304.21	82.111	10	19.319	40	1457.59	3	2355151	21	35	25.75	35
PMC 1305.21	84.223	10	13.282	63	1276.85	3	2521843	1	35	27.91	35
PMC 1306.21	47.531	79	20.354	40	1031.96	14	1375628	67	35	47.75	37.5
PMC 1307.21	77.886	10	12.637	63	842.01	14	1809496	41	35	32.16	35
PMC 1308.21	74.365	38	11.378	63	917.72	14	1744114	41	35	39.16	36.5
PMC 1309.21	65.081	38	14.484	40	817.27	14	1594248	41	35	35.33	36.5

## Sheet: Supp Tables S5A_D. Step B
Supp table S5A. Growth rate (µ) [j-1]. Ratio max/min (R). Ranking (Rank) of the 17 L. platensis strains of the first selection step (sub-cultures 1 to 7). X : strain L. platensis PMC 1230.20 abandoned after sub-culture 3.
Sub-culture number	1		2		3		4		5		6		7		Final rank
	µ	Rank	µ	Rank	µ	Rank	µ	Rank	µ	Rank	µ	Rank	µ	Rank
PMC 851.14	X	ND	X	ND	X	ND	X	ND	X	ND	X	ND	X	ND	ND
PMC 853.14	0.271	9	0.265	9	0.294	12	0.547	6	0.554	9	0.622	9	0.514	9	9
PMC 1227.20	0.274	9	0.275	9	0.31	12	0.506	13	0.551	9	0.6	12	0.49	12	12
PMC 1230.20	0.257	14	0.276	9	0.245	16	X	16	X	16	X	16	X	16	16
PMC 1233.20	0.277	4	0.266	9	0.323	7	0.509	13	0.561	5	0.608	12	0.486	12	9
PMC 1235.20	0.271	9	0.296	1	0.336	1	0.562	1	0.598	1	0.646	3	0.518	3	1
PMC 1238.20	0.271	9	0.283	1	0.313	7	0.57	1	0.589	1	0.675	1	0.536	1	1
PMC 1240.20	0.283	4	0.292	1	0.347	1	0.566	1	0.537	13	0.646	3	0.493	3	1
PMC 1242.20	0.284	4	0.283	1	0.324	7	0.527	12	0.567	5	0.604	12	0.515	12	7
PMC 1243.20	0.304	1	0.291	1	0.322	7	0.575	1	0.579	1	0.659	1	0.533	1	1
PMC 1244.20	0.276	4	0.284	1	0.343	1	0.552	6	0.558	9	0.632	6	0.497	6	7
PMC 1245.20	0.293	3	0.287	1	0.338	1	0.576	1	0.561	5	0.638	6	0.518	6	1
PMC 1246.20	0.264	14	0.251	14	0.311	12	0.533	9	0.557	9	0.615	9	0.476	9	12
PMC 1248.20	0.27	9	0.271	9	0.319	7	0.537	9	0.56	5	0.623	9	0.496	9	9
PMC 1249.20	0.299	1	0.298	1	0.343	1	0.551	6	0.579	1	0.65	3	0.518	3	1
PMC 1254.20	0.283	4	0.259	14	0.295	12	0.54	9	0.531	13	0.625	6	0.475	6	12
PMC 1278.21	0.257	14	0.212	16	0.357	1	0.496	13	0.5	15	0.592	12	0.465	12	12
R	1.18		1.41		1.46		1.16		1.19		1.14		1.14		Rm = 1.23
Supp table S5B. Final biomass (Xf) [g L-1]. Ratio max/min (R). Ranking (Rank) of the 17 L. platensis strains of the first selection step (sub-cultures 1 to 7). X : strain L. platensis PMC 1230.20 abandoned after sub-culture 3. NA: biomass overestimated due to the presence of salt.
Sub-culture number	1		2		3		4		5		6		7		Final rank
	Xf	Rank	Xf	Rank	Xf	Rank	Xf	Rank	Xf	Rank	Xf	Rank	Xf	Rank
PMC 851.14	X	ND	X	ND	X	ND	X	ND	X	ND	X	ND	X	ND	ND
PMC 853.14	1.42	14	0.92	13	1.15	14	1.3	7	1.46	11	0.63	9	1.64	5	13
PMC 1227.20	1.56	7	1.66	1	1.61	5	1.4	3	1.59	1	0.69	3	NA	NA	1
PMC 1230.20	1.65	1	NA	NA	1.18	14	X	16	X	16	X	16	X	16	16
PMC 1233.20	1.6	7	1.04	13	1.14	14	1.21	12	1.55	1	0.63	9	1.7	2	11
PMC 1235.20	1.62	7	1.79	1	1.68	5	1.3	7	1.55	1	0.7	3	1.62	5	1
PMC 1238.20	1.65	1	1.51	7	1.62	5	1.62	1	1.26	13	0.61	11	1.6	8	7
PMC 1240.20	1.56	7	1.66	1	1.5	10	1.39	3	1.61	1	0.75	1	1.55	8	1
PMC 1242.20	1.31	16	1.54	7	1.38	12	0.97	15	1.32	13	0.52	12	1.6	8	15
PMC 1243.20	1.69	1	1.6	7	1.42	12	1.46	3	1.58	1	0.77	1	1.85	1	1
PMC 1244.20	1.58	7	1.57	7	1.85	1	1.27	7	1.57	1	NA	NA	1.47	11	7
PMC 1245.20	1.5	12	1.87	1	1.83	1	1.49	3	1.53	7	0.72	3	1.62	5	1
PMC 1246.20	1.4	14	1.15	12	1.68	5	1.36	7	1.44	11	0.68	3	1.73	2	11
PMC 1248.20	1.73	1	1.52	7	1.51	10	1.26	7	1.48	7	0.68	3	1.45	11	7
PMC 1249.20	1.72	1	1.64	1	1.72	1	1.12	12	1.51	7	0.67	3	1.52	11	7
PMC 1254.20	1.7	1	1.73	1	1.62	5	1.51	1	1.47	7	NA	NA	1.76	2	1
PMC 1278.21	1.55	12	0.58	15	1.86	1	1.17	12	NA	NA	NA	NA	NA	NA	13
R	1.32		3.24		1.63		1.67		1.28		1.48		1.28		Rm = 1.70
Supp table S5C. Final quantities of phycobiliproteins per unit of dry biomass (PBPf) [mg g-1 DW]. Ratio max/min (R). Ranking (Rank) of the 17 L. platensis strains of the first selection step (sub-cultures 1 to 7). X : strain L. platensis PMC 1230.20 abandoned after sub-culture 3. NA : missing values.
Sub-culture number	1		2		3		4		5		6		7		Final rank
	PBPf dw	Rank	PBPf dw	Rank	PBPf dw	Rank	PBPf dw	Rank	PBPf dw	Rank	PBPf dw	Rank	PBPf dw	Rank
PMC 851.14	X	ND	X	ND	X	ND	X	ND	X	ND	X	ND	X	ND	ND
PMC 853.14	119.62	1	92.62	6	75.64	6	55.63	11	127.22	1	110.05	6	70.3	9	6
PMC 1227.20	93.4	5	89.09	6	78.18	6	70.08	8	78.61	5	98.05	6	52.7	10	6
PMC 1230.20	79.6	10	63.86	13	26.71	16	X	16	X	16	X	16	X	16	16
PMC 1233.20	111.9	1	112.22	5	88.46	1	60.65	8	97.55	3	106.43	6	49.78	10	1
PMC 1235.20	65.16	14	68.31	13	60.11	13	54.58	11	45.36	11	98.4	6	59.6	10	14
PMC 1238.20	104.61	5	88.02	6	59.55	13	50.84	11	80.7	5	87.4	12	91.53	1	6
PMC 1240.20	69.76	14	85.97	6	68.47	13	84.26	3	97.8	3	117.61	1	79.33	4	6
PMC 1242.20	110.56	1	131.38	1	97.26	1	92.55	1	55.83	11	117.75	1	74.35	4	1
PMC 1243.20	104.01	5	87.34	6	82.21	6	70.04	8	123.45	1	115.3	1	74.44	4	1
PMC 1244.20	50.85	16	120.25	1	85.18	1	81.98	3	59.4	11	46.88	14	77.04	4	6
PMC 1245.20	87.04	10	57.33	15	85.18	1	58.96	11	55.18	11	111.23	6	60.53	10	13
PMC 1246.20	87.44	10	90.92	6	74.34	6	89.64	3	77.53	10	127.67	1	94.04	1	6
PMC 1248.20	108.27	1	131.14	1	90.55	1	99.68	1	50.61	11	131.03	1	74.49	4	1
PMC 1249.20	100.29	5	123.23	1	73.41	6	84.52	3	94.45	5	107.41	6	58.07	10	1
PMC 1254.20	94.41	5	44.75	15	75.11	6	59.89	11	91.19	5	70.85	13	38.46	15	14
PMC 1278.21	92.05	10	95.89	6	76.31	6	77.3	7	83.26	5	NA	NA	92.45	1	6
R	2.35		2.94		3.64		1.96		2.81		1.48		2.45		Rm = 2.71
Supp table S5D. Final quantities of phycobiliproteins per unit volume of culture (PBPf) [mg L-1]. Ratio max/min (R). Ranking (Rank) of the 17 L. platensis strains of the first selection step (sub-cultures 1 to 7). X : strain L. platensis PMC 1230.20 abandoned after sub-culture 3.
Sub-culture number	1		2		3		4		5		6		7		Final rank
	PBPf vol	Rank	PBPf vol	Rank	PBPf vol	Rank	PBPf vol	Rank	PBPf vol	Rank	PBPf vol	Rank	PBPf vol	Rank
PMC 851.14	X	ND	X	ND	X	ND	X	ND	X	ND	X	ND	X	ND	ND
PMC 853.14	170.26	1	85.03	12	86.68	11	72.42	13	185.24	1	68.89	7	115.44	8	10
PMC 1227.20	145.71	7	147.53	5	125.72	6	97.84	4	125.15	6	67.85	7	116.69	4	3
PMC 1230.20	131.08	10	137.05	6	31.62	16	X	16	X	16	X	16	X	16	16
PMC 1233.20	179.42	1	116.26	6	100.67	11	73.51	13	151.4	3	67.26	12	84.52	13	10
PMC 1235.20	105.56	13	122	6	100.74	11	70.95	13	70.48	11	68.88	7	96.31	8	15
PMC 1238.20	172.25	1	132.92	6	96.47	11	82.57	8	101.69	9	53.31	15	146.26	2	3
PMC 1240.20	109.05	13	142.71	6	102.7	11	117.29	1	157.85	3	88.68	1	122.65	4	3
PMC 1242.20	144.47	7	202.86	1	134.41	1	90.14	8	73.7	11	61.46	12	118.81	4	3
PMC 1243.20	175.43	1	139.39	6	117.06	6	102.12	4	194.56	1	88.78	1	137.71	4	1
PMC 1244.20	80.51	16	188.3	1	157.75	1	103.79	4	93.26	11	66.57	12	113.24	8	10
PMC 1245.20	130.85	10	107.32	12	155.72	1	87.97	8	84.31	11	80.08	5	97.81	8	10
PMC 1246.20	122.12	13	104.2	12	124.6	6	122.27	1	111.96	9	86.56	1	163.07	2	3
PMC 1248.20	186.94	1	199.07	1	136.55	1	125.8	1	75	11	88.57	1	108.01	8	1
PMC 1249.20	172.16	1	201.85	1	126.41	6	94.67	4	143	6	72.39	7	88.04	13	3
PMC 1254.20	160.5	7	77.59	15	121.98	6	90.43	8	134.41	6	77.37	5	67.61	13	10
PMC 1278.21	142.67	10	55.42	15	141.93	1	90.14	8	167.86	3	73.45	7	189.52	1	3
R	2.32		3.66		4.99		1.77		2.76		1.67		2.8		Rm = 2.85

## Sheet: Supp Table S6A-D. Step C
Supp Table S6A. Growth rate (µ) [j-1]. Ratio max/min (R). Ranking (Rank) of the 7 L. platensis strains of the second selection step (sub-cultures 8 to 11). W: White. R: Red. NA: no measurement because the crops were already in the senescence phase (under red light).
Sub-culture number	8		9W		9R		10W		10R		11W		11R		Final rank
	µ	Rank	µ	Rank	µ	Rank	µ	Rank	µ	Rank	µ	Rank	µ	Rank
PMC 1227.20	0.534	7	0.557	6	0.543	7	0.558	6	0.569	4	0.563	6	0.535	3	6
PMC 1240.20	0.548	5	0.554	6	0.578	5	0.558	6	0.551	5	0.568	6	0.563	1	7
PMC 1242.20	0.561	4	0.585	4	0.596	1	0.595	1	0.609	1	0.577	5	0.564	1	1
PMC 1243.20	0.585	3	0.58	4	0.595	1	0.596	1	0.606	1	0.606	1	0.487	7	1
PMC 1246.20	0.6	1	0.588	1	0.591	1	0.593	1	0.518	6	0.593	2	0.507	4	1
PMC 1248.20	0.556	5	0.593	1	0.579	5	0.596	1	NA	NA	0.588	4	0.509	4	5
PMC 1249.20	0.59	1	0.594	1	0.595	1	0.598	1	0.574	3	0.596	2	0.511	4	1
R	1.12		1.07		1.1		1.07		1.17		1.08		1.16		Rm = 1.11
Supp Table S6B. Final biomass (Xf) [g L-1]. Ratio max/min (R). Ranking (Rank) of the 7 L. platensis strains of the second selection step (sub-cultures 8 to 11). W: White. R: Red. NA: no measurement because the crops were already in the senescence phase (under red light).
Sub-culture number	8		9W		9R		10W		10R		11W		11R		Final rank
	Xf	Rank	Xf	Rank	Xf	Rank	Xf	Rank	Xf	Rank	Xf	Rank	Xf	Rank
PMC 1227.20	1.2	5	1.5	5	1.43	4	1.69	1	1.87	1	1.63	2	1.52	2	3
PMC 1240.20	1.4	2	1.68	1	?	?	1.7	1	1.6	3	1.73	1	1.7	1	1
PMC 1242.20	1.13	5	1.42	6	1.6	2	1.59	6	1.65	3	1.31	7	1.38	3	6
PMC 1243.20	1.44	2	1.45	6	1.7	1	1.71	1	1.76	2	1.57	2	NA	NA	2
PMC 1246.20	1.54	1	1.56	4	1.54	3	1.54	7	NA	NA	1.5	5	NA	NA	6
PMC 1248.20	1.19	5	1.61	2	1.37	4	1.72	1	NA	NA	1.63	2	NA	NA	3
PMC 1249.20	1.41	2	1.58	2	1.43	4	1.72	1	1.61	3	1.51	5	NA	NA	3
R	1.36		1.18		1.24		1.12		1.17		1.32		1.24		Rm = 1.23
Supp Table S6C. Final quantities of phycobiliproteins per unit of dry biomass (PBPf) [mg g-1 DW]. Ratio max/min (R). Ranking (Rank) of the 7 L. platensis strains of the second selection step (sub-cultures 8 to 11). W: White. R: Red. NA: no measurement because the crops were already in the senescence phase (under red light).
Sub-culture number	8		9W		9R		10W		10R		11W		11R		Final rank
	PBP dw	Rank	PBP dw	Rank	PBP dw	Rank	PBP dw	Rank	PBP dw	Rank	PBP dw	Rank	PBP dw	Rank
PMC 1227.20	109.05	3	94.39	4	96.62	2	66.86	6	51.15	5	120.17	2	93.76	2	4
PMC 1240.20	104.5	5	91.84	4	NA	NA	60.32	6	62.84	4	98.76	7	58.09	4	6
PMC 1242.20	137.02	1	108.02	1	106.77	1	123.49	1	99.68	1	143.82	1	109.78	1	1
PMC 1243.20	109.77	3	83.78	6	91.78	4	104.18	3	76.58	3	116.06	4	69.58	3	4
PMC 1246.20	100.51	5	111.19	1	99.18	2	113.14	1	NA	NA	122.35	2	NA	NA	2
PMC 1248.20	131.4	1	103.85	3	NA	NA	101.01	3	NA	NA	114.06	4	NA	NA	3
PMC 1249.20	102.38	5	86.85	6	81.08	5	95.05	5	83.82	2	116.34	4	NA	NA	6
R	1.36		1.33		1.32		2.05		1.95		1.46		1.89		Rm = 1.62
Supp Table S6D. Final quantities of phycobiliproteins per unit volume of culture (PBPf) [mg L-1]. Ratio max/min (R). Ranking (Rank) of the 7 L. platensis strains of the second selection step (sub-cultures 8 to 11). W: White. R: Red. NA: no measurement because the crops were already in the senescence phase (under red light).
Sub-culture number	8		9W		9R		10W		10R		11W		11R		Final rank
	PBP vol	Rank	PBP vol	Rank	PBP vol	Rank	PBP vol	Rank	PBP vol	Rank	PBP vol	Rank	PBP vol	Rank
PMC 1227.20	130.86	7	141.4	5	138.17	3	112.86	6	95.86	4	196.36	2	142.71	1	5
PMC 1240.20	146.72	5	153.92	3	144.04	3	102.79	6	100.8	4	171.06	1	98.87	3	6
PMC 1242.20	154.84	1	153.18	3	170.62	1	196.84	1	164.67	1	188.12	7	151.28	1	1
PMC 1243.20	158.07	1	121.32	7	127.74	5	178.57	1	112.34	3	182.44	2	NA	NA	4
PMC 1246.20	154.99	1	173.46	1	152.34	1	173.78	3	NA	NA	184.02	5	NA	NA	2
PMC 1248.20	156.11	1	166.78	1	65.25	7	174.14	3	NA	NA	186.15	2	NA	NA	3
PMC 1249.20	143.95	5	137.57	5	115.62	5	163.3	3	134.78	2	175.21	5	NA	NA	6
R	1.21		1.43		2.62		1.91		1.72		1.75		1.53		Rm = 1.65
